# Supplementary material for: Growth rates and the prevalence and progression of scoliosis in short-statured children on Australian growth hormone treatment programmes
Source: Springer Nature journal article supplement (doi:10.1186/1748-7161-2-3), 2007-02-22
Supplement: Additional file 1 [file 1748-7161-2-3-s1.pdf]

| Gender | Birthdate | GH start | age com | Duration   | Extra    | Syndrome           | Deceased | Scoliosis |
|--------|-----------|----------|---------|------------|----------|--------------------|----------|-----------|
| M      | 22.05.88  | 19.01.96 | 7.7     |            |          | Nephrotic          | Yes      | N/A       |
| F      | 10.06.78  | 10.01.88 | 9.5     |            |          | Turner             | No       | Yes       |
| F      | 26.03.91  | 22.05.98 | 7.1     | 4.5 years  |          | Poly kidney        | No       | No        |
| M      | 02.04.87  | 30.04.90 | 3       | 10 years   |          | Panhypo            | No       | No        |
| M      | 03.03.87  | 25.10.91 | 4.7     | 10.5 years |          | Hypokyph           | No       | No        |
| F      | 26.09.83  | 09.11.90 | 7.1     | 3 years    |          | Spina bifid        | No       | Yes       |
| M      | 16.03.76  | 17.02.89 | 12.9    | 2 years    |          | Seizures           | No       | No        |
| F      | 09.02.79  | 10.06.88 | 9.5     | 6 years    |          | ISS                | No       | Yes       |
| M      | 05.09.87  | 02.11.98 | 12.1    |            |          |                    | No       | No        |
| M      | 02.09.80  | 30.10.92 | 12.1    | 4 years    |          |                    | No       | No        |
| M      | 05.05.82  | 12.06.97 | 15.1    | 2.5 years  |          |                    | No       | No        |
| M      | 05.10.77  | 31.05.91 | 13.5    | 4.5 years  |          |                    | No       | No        |
| F      | 05.04.80  | 20.08.91 | 11.3    | 6 years    |          | pit tumour         | No       | No        |
| M      | 05.05.88  | 09.01.95 | 6.5     | 5 years    |          |                    | No       | No        |
| F      | 26.11.79  | 09.03.92 | 12.3    | "little"   |          |                    | No       | No        |
| M      | 30.01.76  | 01.06.90 | 14.4    | 3 years    |          |                    | No       | No        |
| M      | 17.05.89  | 22.01.96 | 6.7     | 7.5 years  |          |                    | No       | No        |
| F      | 28.07.83  | 07.06.90 | 6.9     |            |          | Turner             | No       | No        |
| F      | 07.03.84  | 02.12.91 | 7.7     | 8.5 years  |          | Turner             | No       | No        |
| M      | 14.03.86  | 02.08.91 | 5.4     | 5 years    |          |                    | No       | No        |
| F      | 14.11.91  | 08.12.97 | 6.1     |            |          |                    | No       | No        |
| F      | 15.05.92  | 03.06.96 | 4.1     | 7 years    |          |                    | No       | No        |
| F      | 21.12.81  | 11.01.93 | 11.1    | 6.5 years  |          | Turner             | No       | No        |
| M      | 19.03.81  | 17.03.89 | 8       | 5 years    |          |                    | No       | No        |
| F      | 13.06.82  | 16.07.93 | 11.1    | 5 years    |          | ?                  | No       | No        |
| F      | 27.04.83  | 02.08.96 | 13.3    |            |          |                    | No       | No        |
| F      | 20.12.82  | 13.10.95 | 12.9    | 4 years    |          | Downs              | No       | Yes       |
| M      | 03.04.81  | 19.10.92 | 11.5    | 3.5 years  |          |                    | No       | No        |
| F      | 29.12.80  | 03.08.90 | 9.7     | 5.5 years  |          | Fanconi<br>Rickets | No       | Yes       |
| M      | 22.02.80  | 08.02.90 | 10      | 1 Year     |          |                    | No       | No        |
| F      | 19.05.79  | 25.11.88 | 9.5     | 5 years    |          | Turner             | No       | Yes       |
| F      | 07.02.88  | 26.08.96 | 8.5     |            |          |                    | No       | No        |
| M      | 03.04.79  | 14.05.93 | 14.1    |            |          |                    | No       | No        |
| M      | Deceased  |          |         |            |          |                    | Yes      | N/A       |
| F      | 16.02.82  | 18.06.90 | 8.3     | 4 years    |          | Turner             | No       | Yes       |
| M      | 24.02.87  | 15.06.98 | 11.3    | 3.5 years  |          | Addison's          | No       | No        |
| F      | 19.08.84  | 08.07.96 | 11.9    | 2.5 years  |          |                    | No       | No        |
| M      | 20.04.80  | 12.08.88 | 8.3     |            |          |                    | No       | No        |
| F      | 14.04.80  | 25.11.88 | 8.6     | 4.5 years  |          | Turner             | No       | No        |
| F      | 10.04.87  | 16.02.98 | 10.9    | 5 years    |          | Turner             | No       | Yes       |
| M      | 24.03.86  | 07.12.92 | 6.8     | 8 years    |          |                    | No       | No        |
| M      | 26.12.74  | 16.09.89 | 14.7    |            |          |                    | No       | Yes       |
| M      | Deceased  | 17.03.88 |         |            |          |                    | Yes      | N/A       |
| F      | 07.08.78  | 05.02.85 | 6.5     | 8 years    |          |                    | No       | No        |
| F      | 12.08.78  | 03.12.86 | 8.3     | 6 years    |          |                    | No       | No        |
| F      | 04.11.88  | 04.02.94 | 5.2     | 8.5 years  | Madelung | Turner             | No       | No        |
| M      | 01.02.86  | 04.12.98 | 12.8    | 3 years    |          |                    | No       | No        |
| F      | 12.09.85  | 11.05.98 | 12.7    | 3 years    |          | Turner             | No       | Yes       |
| F      | 08.10.81  | 29.11.88 | 7.1     |            |          | Turner             | No       | Yes       |
| M      | 27.02.86  | 28.08.92 | 6.5     | 9 Years    |          |                    | No       | No        |





| 16   | 17 | Actual height | 3  | 4    | 5    | 6   | 7   | 8   | 9   | 10  | 11  | 12  | 13  | 14  |
|------|----|---------------|----|------|------|-----|-----|-----|-----|-----|-----|-----|-----|-----|
| 3    |    |               |    |      |      |     |     |     | 113 | 118 | 122 | 127 | 135 | 142 |
|      |    |               |    | 94.5 | 95.5 | 100 | 105 | 112 | 115 | 120 | 129 | 135 |     |     |
|      |    |               | 79 | 92   | 99   | 104 | 111 | 114 | 120 | 125 | 130 | 136 |     |     |
| 2    |    |               | 56 |      | 58   |     |     |     |     |     |     |     |     |     |
|      |    |               |    |      |      | 98  | 100 | 105 |     |     |     | 155 |     |     |
| 25   |    |               |    |      |      |     |     |     |     |     |     | 132 | 133 | 134 |
| 2.5  |    |               | 84 | 88   | 93   | 98  | 102 | 106 | 109 | 117 | 124 | 128 | 133 | 140 |
|      |    |               |    |      |      |     |     |     |     |     |     |     |     |     |
| 1    |    |               |    |      |      |     |     |     |     |     | 113 | 122 | 126 | 128 |
| 2    |    |               |    |      |      |     |     |     |     |     | 130 | 131 | 135 | 138 |
| 3    |    |               |    |      |      |     |     |     |     |     |     | 133 | 139 | 144 |
| 15   |    |               |    | 104  | 104  | 106 | 108 | 112 | 115 |     | 121 | 130 | 135 | 140 |
|      |    |               | 83 | 88   | 94   | 99  | 105 | 113 | 117 | 124 | 130 | 137 | 147 |     |
|      |    |               |    |      |      |     |     |     |     |     | 128 |     | 137 | 138 |
|      |    |               | 86 | 92   | 97   | 103 | 108 | 120 | 126 | 132 | 137 | 143 | 151 | 159 |
|      |    |               |    |      |      |     |     |     |     |     |     |     |     |     |
| 15   |    |               |    |      |      | 103 | 108 | 114 | 120 | 126 | 132 | 137 | 143 | 148 |
|      |    |               |    | 90   | 98   | 104 | 112 | 117 | 124 | 129 | 133 | 137 | 144 |     |
|      |    |               |    |      |      |     |     |     |     |     |     |     |     |     |
|      |    |               | 76 | 82   | 96   | 105 | 112 | 121 | 127 | 133 | 136 |     |     |     |
| 1.5  |    |               |    |      |      |     |     | 110 | 112 | 116 | 121 | 128 | 133 | 138 |
| 5    |    |               |    |      |      |     | 109 | 112 | 118 | 125 | 130 | 135 | 143 | 153 |
| 1    |    |               |    |      | 88   | 93  | 99  | 104 | 108 | 114 | 119 | 123 | 126 | 126 |
|      |    |               |    |      |      |     |     |     |     |     |     |     |     |     |
| 2    |    |               |    | 92   | 100  | 103 | 107 | 110 | 115 | 117 | 122 | 127 | 131 | 138 |
| 8    |    |               |    |      |      |     |     |     |     | 124 | 127 | 134 | 141 | 150 |
| 2.52 |    |               |    |      |      | 103 | 107 | 111 | 113 | 118 | 125 | 130 | 135 | 143 |
|      |    |               |    |      |      |     |     |     |     |     |     |     |     |     |
|      |    |               |    |      |      |     |     |     |     |     |     |     |     |     |
|      |    |               |    |      |      |     |     |     |     | 117 | 126 | 132 | 137 | 140 |
|      |    |               |    |      |      |     |     |     |     |     |     |     |     |     |
|      |    |               |    |      |      |     |     |     |     |     |     |     |     |     |
| 2.5  |    |               |    |      |      |     |     | 112 | 116 | 123 | 129 | 130 | 138 | 142 |
|      |    |               |    |      |      |     |     |     |     |     | 124 | 128 | 139 | 146 |
|      |    |               |    |      |      | 100 | 103 | 108 | 114 | 118 | 122 | 126 | 135 | 139 |
|      |    |               |    |      |      |     |     |     |     |     |     |     |     |     |
| 1    |    |               | 87 | 91   | 98   | 103 | 108 | 113 | 118 | 125 | 131 | 136 | 139 | 141 |
| 4    |    |               |    |      |      |     |     |     | 118 | 122 | 125 | 132 | 136 | 141 |
|      |    |               |    |      | 93   | 97  | 100 | 119 | 130 | 136 | 144 | 150 | 154 | 159 |
| 5    |    |               |    |      |      |     |     |     |     |     |     |     |     |     |
|      |    |               |    |      |      |     |     |     |     |     |     |     |     |     |
| 5    |    |               |    |      |      |     |     |     |     |     | 132 | 137 | 145 | 149 |
|      |    |               |    |      |      | 96  | 108 | 109 | 116 | 122 | 134 | 142 | 144 | 144 |
|      |    |               | 88 | 93   | 96   | 101 | 108 | 115 | 120 | 126 | 133 | 139 | 144 | 147 |
| 50   |    |               |    |      |      |     |     |     |     | 135 | 138 | 140 | 146 | 156 |
| 1    |    |               | 81 | 87   | 93   | 96  | 100 | 103 | 107 | 110 | 114 | 117 | 121 | 126 |
|      |    |               |    |      |      |     |     |     |     |     |     |     |     |     |
|      |    |               | 78 | 83   | 86   | 91  | 96  | 103 | 110 | 117 | 120 | 127 | 133 | 136 |

| 15  | 16  | 17  | 18    | Growth hormone |             | Dose IU/W | Months 1 | Dose IU/W | Months 2 | Dose IU/W |
|-----|-----|-----|-------|----------------|-------------|-----------|----------|-----------|----------|-----------|
|     |     |     |       |                |             | 12        | 15       |           |          |           |
| 145 | 147 | 148 |       |                |             | 24        | 36       | 42        | 48       | 35        |
|     |     |     |       | Saizen         | Norditropin | 12        | 14       | 16        | 6        | 20        |
|     |     |     |       | Somaton        | Saizen      | 7         | 31       | 9         | 11       | 14        |
| ?73 |     | ?75 | Data? |                |             | 8         | 36       | 12        | 18       | 16        |
| 159 |     |     |       |                |             | 7         | 12       |           |          |           |
| 157 | 162 | 165 |       |                |             | 14        | 12       | 30        | 12       |           |
| 143 | 145 | 147 | 148   |                |             | 11        | 12       | 14        | 60       |           |
|     |     |     |       |                |             | 18        | 3        | nil       | 24       | 18        |
| 130 | 136 | 140 | 146   | Somaton        | Saizen      | 14        | 3        | 12        | 2        | 28        |
| 143 | 155 | 158 | 164   |                |             | 18        | 72       |           |          |           |
| 153 | 160 | 164 |       |                |             | 20        | 24       | 18        | 6        | 20        |
| 148 | 155 |     |       | Somaton        | Saizen      | 14        | 2        | 7         | 4        | 14        |
|     |     |     |       | Genotropi      |             | 8         | 3        | 9         | 7        | 12        |
|     |     |     |       |                |             | 18        | 15       |           |          |           |
|     |     |     |       |                |             | 14        | 12       |           |          |           |
|     |     |     |       | Norditrop      |             | 9         | 31       | 12        | 8        | 15        |
|     |     |     |       |                |             | 16        | 6        | 18        | 18       | 24        |
| 153 | 153 | 156 |       | Somaton        | Saizen      | 18        | 15       | 24        | 20       | 28        |
|     |     |     |       | Genotropi      |             | 8         | 23       | 12        | 9        | 18        |
|     |     |     |       |                |             | 9         | 15       | 12        | 18       | nil       |
|     |     |     |       | Humatro        |             | 7         | 36       | 12        | 9        | 18        |
| 141 | 143 | 144 |       |                |             |           |          |           |          |           |
| 159 | 161 | 163 |       | Somaton        | Genotropi   | 10        | 5        | 18        | 40       | 18        |
| 126 | 127 |     | 130   |                |             | 21        | 3        | 18        | 10       |           |
|     |     |     |       |                |             | 18        | 30       |           |          |           |
| 141 | 144 |     |       |                |             |           |          |           |          |           |
| 156 | 162 | 164 |       | Humatro        | Saizen      | 17        | 3        | 18        | 8        | 19        |
| 145 |     | 148 |       | Genotrop       |             | 12        | 14       | 18        | 15       | 20        |
|     |     |     |       |                |             |           |          |           |          |           |
|     |     |     |       |                |             | 12        | 24       |           |          |           |
|     |     |     |       | Genotrop       |             | 24        | 6        | 29        | 6        | 34        |
|     |     |     |       | Genotrop       |             | 14        | 8        | 7         | 5        |           |
|     |     |     |       |                |             |           |          |           |          |           |
| 144 | 147 | 149 |       | Humatro        | Saizen      | 12        | 16       | 18        | 14       | 30        |
| 154 |     |     |       | Genotrop       |             | 14        | 11       | 18        | 14       | 16        |
|     |     |     |       | Genotrop       |             | 16        | 3        | 14        | 3        | 16        |
|     |     |     |       | Genotrop       |             | 13        | 12       | 14        | 3        | 32        |
| 143 | 144 |     |       | Genotrop       |             | 29        | 6        | 34        | 12       | 36        |
| 146 | 151 |     |       |                |             |           |          |           |          |           |
| 165 |     |     |       | Humatro        | Saizen      | 11        | 27       | 14        | 7        | 15        |
|     |     |     |       | Somaton        |             | 24        | 15       | 30        | 27       | 42        |
|     |     |     |       |                |             |           |          |           |          |           |
| 150 | 151 |     |       | Pit-hGH        | Somaton     | 4         | 4        | nil       | 15       | 12        |
| 144 |     |     |       |                |             | 12        | 48       | 24        | 24       |           |
|     |     |     |       | Humatro        |             | 9         | 9        | 12        | 7        | 16        |
| 168 | 173 | 174 |       |                |             | 16        | 9        | 18        | 42       |           |
| 131 |     |     |       |                |             | 20        | 12       | 30        | 48       |           |
|     |     |     |       | Genotrop       |             | 22        | 6        | 24        | 12       | 29        |
| 140 |     |     |       | Genotrop       |             | 7         | 15       | 9         | 18       | 12        |

| Months 3 | Dose IU/W | Months 4 | Dose IU/W | Months 5 | Dose IU/W | Months 6 | Dose IU/W | Months 7 |
|----------|-----------|----------|-----------|----------|-----------|----------|-----------|----------|
|          |           |          |           |          |           |          |           |          |
| 6        |           |          |           |          |           |          |           |          |
| 13       | 28        | 4        | 30        | 14       |           |          |           |          |
| 12       | 16        | 9        | 18        | 24       | 20        | 4        |           |          |
| 54       |           |          |           |          |           |          |           |          |
|          |           |          |           |          |           |          |           |          |
|          |           |          |           |          |           |          |           |          |
| 9        | 28        | 3        |           |          |           |          |           |          |
| 8        | nil       | 18       | 30        | 16       |           |          |           |          |
|          |           |          |           |          |           |          |           |          |
| 9        |           |          |           |          |           |          |           |          |
| 4        | 17        | 1        | 14        | 24       | 18        | 24       | 35        | 8        |
| 6        | 14        | 4        | nil       | 8        | 14        | 16       | 16        | 12       |
|          |           |          |           |          |           |          |           |          |
|          |           |          |           |          |           |          |           |          |
| 25       | 20        | 5        | 21        | 12       |           |          |           |          |
| 12       |           |          |           |          |           |          |           |          |
| 13       | 32        | 32       | 34        | 8        | 35        | 20       | 40        | 11       |
| 32       | nil       | 16       | 25        | 16       | 29        | 30       |           |          |
| 6        | 12        | 12       | 15        | 18       |           |          |           |          |
| 3        | 12        | 18       | nil       | 4        | 12        | 7        |           |          |
|          |           |          |           |          |           |          |           |          |
| 5        | 24        | 18       |           |          |           |          |           |          |
|          |           |          |           |          |           |          |           |          |
|          |           |          |           |          |           |          |           |          |
| 6        | 20        | 3        | 21        | 8        | 22        | 10       | 38        | 3        |
| 12       | 30        | 11       | nil       | 1        | 30        | 5        |           |          |
|          |           |          |           |          |           |          |           |          |
|          |           |          |           |          |           |          |           |          |
| 19       | 36        | 3        | 39        | 7        | 42        | 11       | 48        | 3        |
| 14       | 3         | 203      | 14        | 2        | 20        | 11       | 28        | 5        |
|          |           |          |           |          |           |          |           |          |
|          |           |          |           |          |           |          |           |          |
| 6        |           |          |           |          |           |          |           |          |
| 14       | 26        | 11       |           |          |           |          |           |          |
| 14       | 24        | 4        |           |          |           |          |           |          |
| 18       | 40        | 9        | 46        | 46       | 44        | 3        | 56        | 15       |
| 6        | 40        | 6        | 44        | 22       | 48        | 2        |           |          |
|          |           |          |           |          |           |          |           |          |
| 15       | 20        | 21       | 25        | 9        | nil       | 2        | 30        | 28       |
| 3        |           |          |           |          |           |          |           |          |
|          |           |          |           |          |           |          |           |          |
| 53       | 18        | 24       |           |          |           |          |           |          |
|          |           |          |           |          |           |          |           |          |
| 30       | 24        | 24       | 30        | 15       | 32        | 15       | 36        | 3        |
|          |           |          |           |          |           |          |           |          |
|          |           |          |           |          |           |          |           |          |
| 8        | 30        | 3        | 31        | 15       | 32        | 20       |           |          |
| 20       | 21        | 7        | nil       | 11       | 20        | 22       | 24        | 25       |

| Mg/Kg | Mg/Kg | Mg/Kg | Mg/Kg |
|-------|-------|-------|-------|
| 0.55  | 0.48  |       |       |
| 0.72  | 0.82  | 0.44  | 0.52  |
| 0.65  | 0.55  | 0.9   | 0.79  |
| 0.77  | 0.95  | 0.5   |       |
| 0.62  | 0.67  | 0.38  |       |
| 0.43  | 0.45  |       |       |
| 0.4   | 0.9   |       |       |
| 0.59  | 0.67  | 0.58  |       |
| 0.35  | 0.47  | 0.81  |       |
| 0.83  | 0.81  |       |       |
| 0.48  | 0.32  |       |       |
| 0.49  | 0.38  |       |       |
| 0.48  | 0.25  | 0.57  | 0.61  |
|       |       |       |       |
| 0.4   | 0.33  |       |       |
| 0.46  | 0.44  |       |       |
| 0.6   | 0.41  | 0.65  | 0.53  |
| 0.91  | 1.14  | 0.92  |       |
| 1     | 1.05  | 0.63  | 0.84  |
| 0.6   | 0.63  | 0.47  |       |
| 0.62  | 0.53  | 0.69  | 0.63  |
| 0.66  | 0.37  | 0.8   | 0.32  |
|       |       |       |       |
| 0.5   | 0.9   |       |       |
| 0.93  | 0.79  |       |       |
| 0.5   | 0.34  |       |       |
|       |       |       |       |
| 0.39  | 0.37  | 0.7   | 0.64  |
| 0.51  | 0.48  | 0.99  | 0.86  |
|       |       |       |       |
| 0.45  | 0.55  |       |       |
| 1.14  | 1.3   | 0.97  | 1.19  |
| 0.72  | 0.34  | 0.87  | 0.95  |
|       |       |       |       |
|       |       |       |       |
| 0.44  | 0.98  |       |       |
| 0.54  | 0.43  | 0.67  |       |
| 0.57  | 0.5   | 0.73  |       |
| 0.52  | 1.2   | 0.96  |       |
| 1.26  | 0.98  |       |       |
|       |       |       |       |
| 0.58  | 0.42  | 0.71  | 0.66  |
| 0.6   | 0.8   |       |       |
|       |       |       |       |
| 0.63  | 0.38  |       |       |
| 0.49  | 0.23  | 0.39  |       |
| 0.67  | 1.04  | 0.8   |       |
| 0.39  | 0.28  |       |       |
| 0.74  | 0.62  | 0.94  | 0.78  |
| 1.29  | 0.88  |       |       |
| 0.53  | 0.58  | 0.81  | 0.59  |
